# Supplementary material for: Pore selectivity and electron transfers in HZSM-5 single crystals: a Raman microspectroscopy mapping and confocal fluorescence imaging combined study
Source: Royal Society of Chemistry journal article supplement (doi:10.1039/d0cp02018d), 2020-01-01
Supplement: d0cp02018d1.pdf [file d0cp02018d1.pdf]

## - Supplementary Information -

### Pore selectivity and electron transfers in HZSM-5 single crystals: A Raman microspectroscopy mapping and confocal fluorescence imaging combined study

A. Moissette\*, M. Hureau, M. Moreau and J.P. Cornard

*LASIRE, Bât. C5, Faculté des Sciences et Technologies, Université de Lille, 59655 Villeneuve d'Ascq cedex, France*

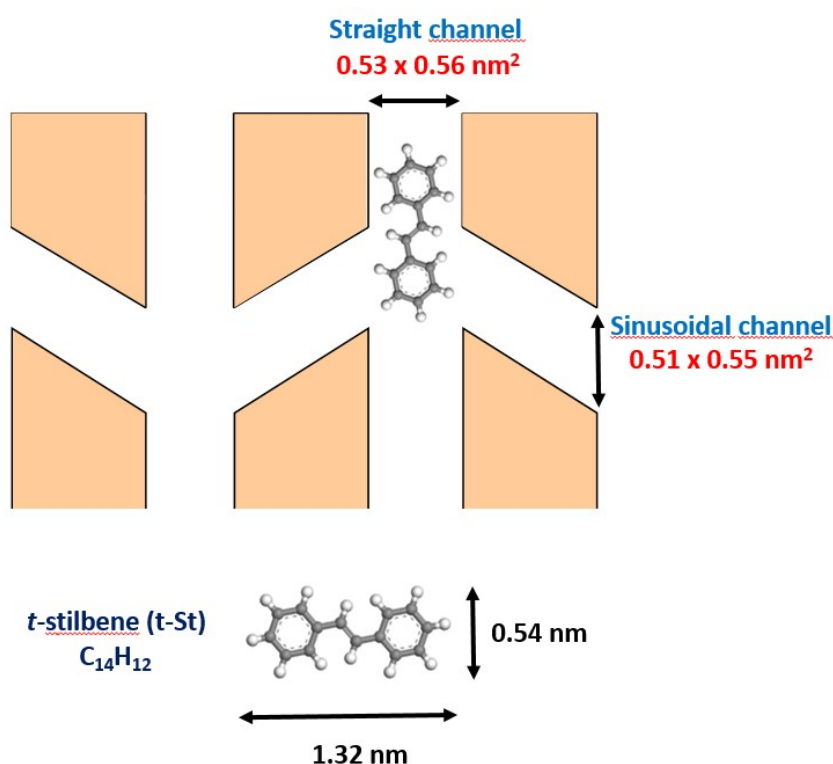

**Figure S1:** Schematic representation of the channels network of ZSM-5 structure with straight and sinusoidal channels. The close match between pore diameter and molecule dimensions makes a good fit of t-St in the ZSM-5 channels.

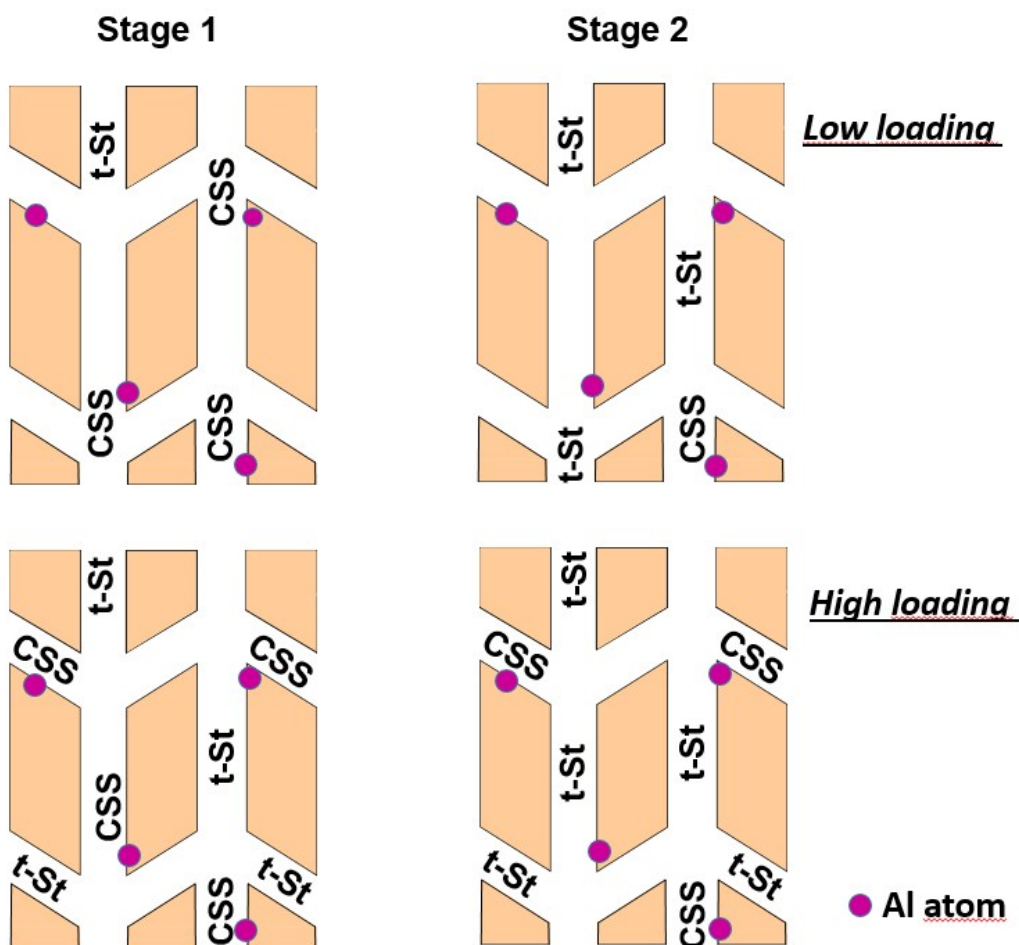

**Figure S2:** Schematic representation proposed to describe the distribution of the charge separated states and neutral molecules incorporated in the straight and sinusoidal channels for low and high loadings.

*t-St:* neutral *t*-Stilbene

*CSS:* Charge Separated State (Radical cation or CTC)

- Stage 1: the system is stabilized and contains *CSS* and *t-St*

- Stage 2: After very long times, recombination of *CSS* occurs partially to give *t-St*.

- Low loading: molecules and subsequent *CSS* are incorporated only in straight channels

- High loading: molecules and *CSS* are in straight and sinusoidal channels
